# Supplementary material for: The Effect of Fibulin-5 on Hydrocephalus After Subarachnoid Hemorrhage in Mice
Source: Research Square preprint supplement (doi:10.21203/rs.3.rs-6322105/v1), 2025-04-30
Supplement: Supplementary file 1 [file 3a5daba0410fca6085fd4be5.docx]

**Supplementary Material**

Supplementary Tables and Figures

***Molecular Neurobiology***

**The Effect of Fibulin-5 on Hydrocephalus After Subarachnoid Hemorrhage in Mice**

Yume Suzuki, Mai Nampei, Fumihiro Kawakita, Hiroki Oinaka, Hideki Nakajima,

and Hidenori Suzuki

Address correspondence to: Yume Suzuki, M.D., Ph.D.

Department of Neurosurgery, Mie University Graduate School of Medicine, 2-174 Edobashi, Tsu, Mie 514-8507, Japan

E-mail: box_308044@yahoo.co.jp

ORCID: 0000-0003-4853-395X

**Supplementary Table S1** The number of animals and mortality in experiment 1

| Modeling | Treatment | Mortality | Mild SAH | Total mortality | p value |
| --- | --- | --- | --- | --- | --- |
| Sham | PBS | 0/12 (0.0%) | 0 | 0/12 (0.0%) |  |
| SAH | PBS | 1/16 (6.3%) | 3 | 6/47 (12.8%) | 0.485 |
| Short rFBLN5 0.01μg | 2/8 (25.0%) | 0 |
| Short rFBLN5 0.1μg | 0/7 (0.0%) | 1 |
| Long rFBLN5 0.01μg | 2/9 (22.2%) | 1 |
| Long rFBLN5 0.1μg | 1/7 (14.3%) | 0 |

Data, the number of dead mice / total number of mice (mortality). Mild subarachnoid hemorrhage (SAH) is defined as SAH grading score ≤7. PBS, phosphate-buffered saline; rFBLN5, recombinant fibulin-5. Fisher’s exact test was used to compare the mortality of each SAH group

**Supplementary Table S2** The number of animals and mortality in experiment 2

| Modeling | Treatment | Mortality | Mild SAH | Total mortality | p value |
| --- | --- | --- | --- | --- | --- |
| Sham | PBS | 0/16 (0.0%) | 0 | 0/16 (0.0%) |  |
| SAH | PBS | 19/39 (48.7%) | 4 | 27/84 (32.1%) | 0.028 |
| Short rFBLN5 0.01μg | 3/15 (20.0%) | 4 |
| Short rFBLN5 0.1μg | 4/14 (28.6%) | 1 |
| Long rFBLN5 0.01μg | 0/7 (0.0%) | 1 |
| Long rFBLN5 0.1μg | 1/9 (11.1%) | 1 |

Data, the number of dead mice / total number of mice (mortality). Mild subarachnoid hemorrhage (SAH) is defined as SAH grading score ≤4. PBS, phosphate-buffered saline; rFBLN5, recombinant fibulin-5. Fisher’s exact test was used to compare the mortality of each SAH group

**Supplementary Table S3** The number of animals and mortality in experiment 3

| Modeling | Treatment | Mortality | Mild SAH | Total mortality | p value |
| --- | --- | --- | --- | --- | --- |
| Sham | PBS | 0/6 (0.0%) | 0 | 0/6 (0.0%) |  |
| SAH | PBS | 2/8 (25.0%) | 0 | 5/23 (21.7%) | 0.370 |
| Long rFBLN5 0.01μg | 0/6 (0.0%) | 0 |
| Long rFBLN5 0.1μg | 3/9 (33.3%) | 0 |

Data, the number of dead mice / total number of mice (mortality). Mild subarachnoid hemorrhage (SAH) is defined as SAH grading score ≤4. PBS, phosphate-buffered saline; rFBLN5, recombinant fibulin-5. Fisher’s exact test was used to compare the mortality of each SAH group

**Supplementary Table S4** The number of animals and mortality in experiment 4

| Modeling | Treatment | Mortality | Mild SAH | Total mortality | p value |
| --- | --- | --- | --- | --- | --- |
| Sham | PBS | 0/6 (0.0%) | 0 | 0/6 (0.0%) |  |
| SAH | PBS | 5/15 (33.3%) | 3 | 6/31 (19.4%) | 0.217 |
| Long rFBLN5 0.01μg | 0/7 (0.0%) | 1 |
| Long rFBLN5 0.1μg | 1/9 (11.1%) | 1 |

Data, the number of dead mice / total number of mice (mortality). Mild subarachnoid hemorrhage (SAH) is defined as SAH grading score ≤4. PBS, phosphate-buffered saline; rFBLN5, recombinant fibulin-5. Fisher’s exact test was used to compare the mortality of each SAH group


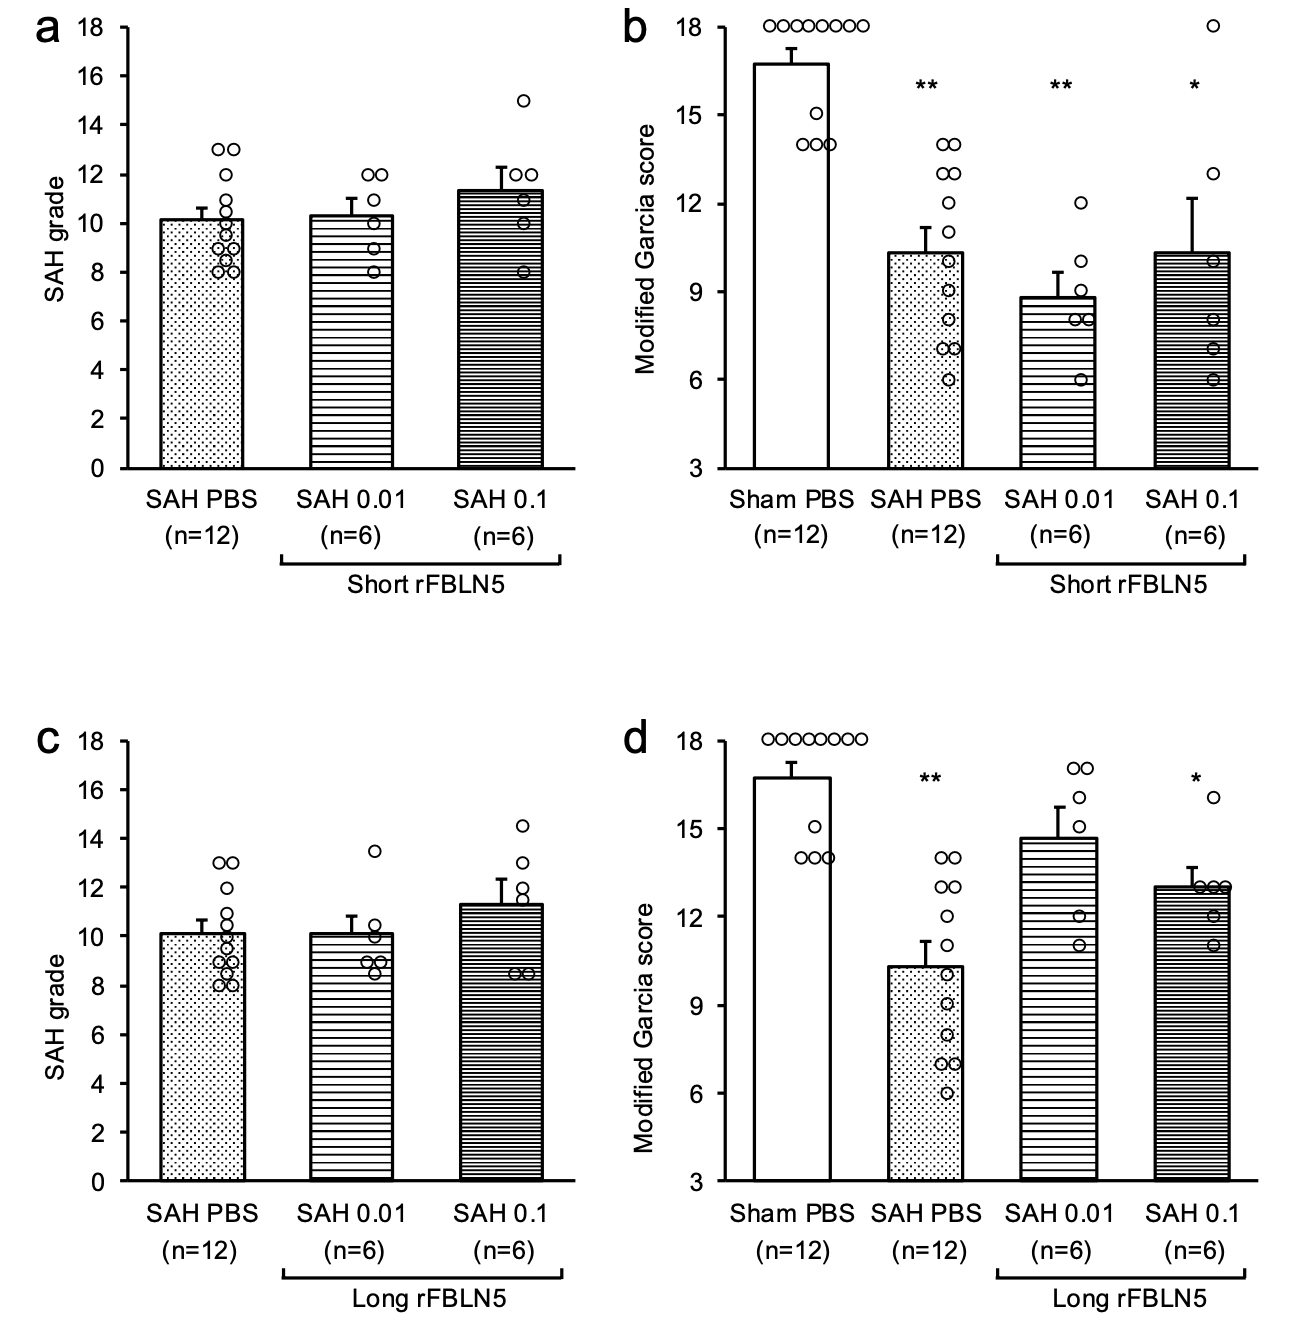


**Supplementary Fig. S1** The effects of 2 dosages (0.01 or 0.1μg) of recombinant fibulin-5 (rFBLN5) administration on subarachnoid hemorrhage (SAH) grade (**a**, **c**) and neurological score (**b**, **d**) at 24 hours after SAH. To reduce the number of mice sacrificed, sham phosphate-buffered saline (PBS) mice and SAH PBS mice are duplicated in both analyses. *p<0.05 vs Sham PBS group, and **p<0.01 vs Sham PBS group; one-way ANOVA (**a**, **c**) or Kruskal-Wallis test (**b**, **d**)


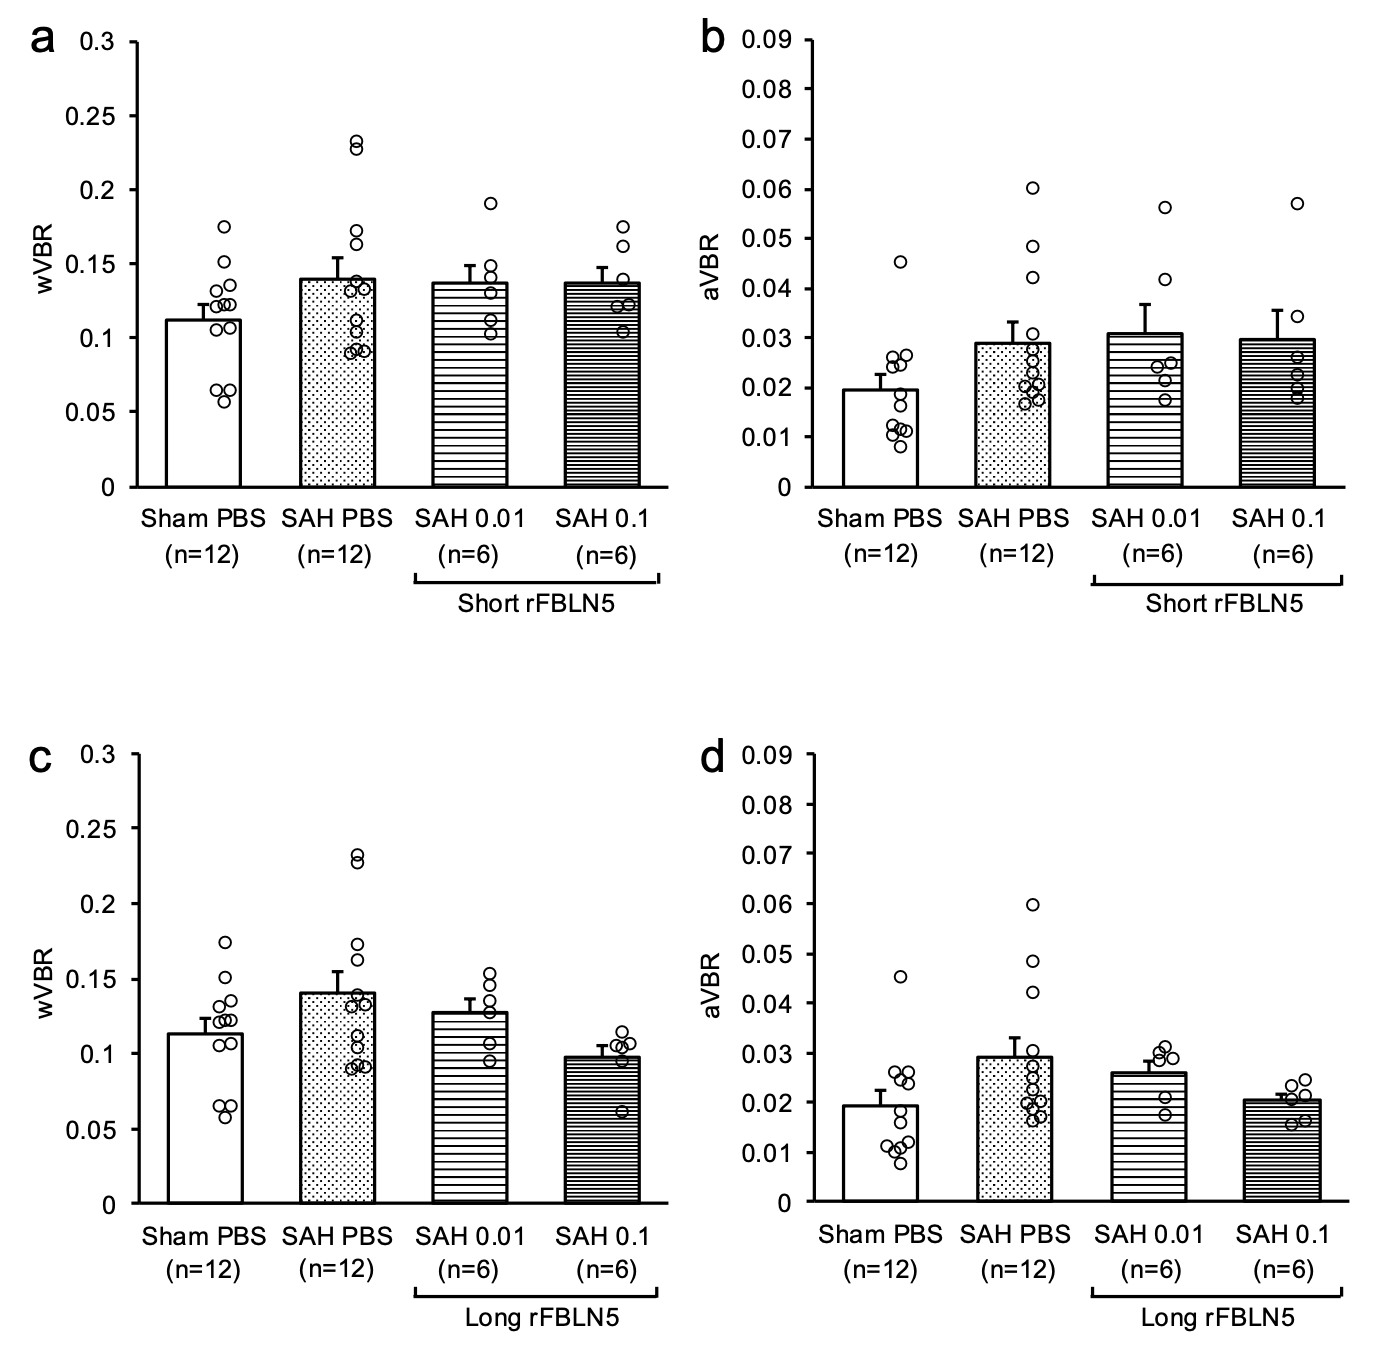


**Supplementary Fig. S2** The effects of two dosages (0.01 or 0.1μg) of administered short or long recombinant fibulin-5 (rFBLN5) on ventricle-to-brain ratio at 24 hours after subarachnoid hemorrhage (SAH). There are no significant differences among the groups (**a**, one-way ANOVA; **b**–**d**, Kruskal-Wallis test). aVBR, area of ventricle-to-brain ratio; wVBR, width of ventricle-to-brain ratio; PBS, phosphate-buffered saline


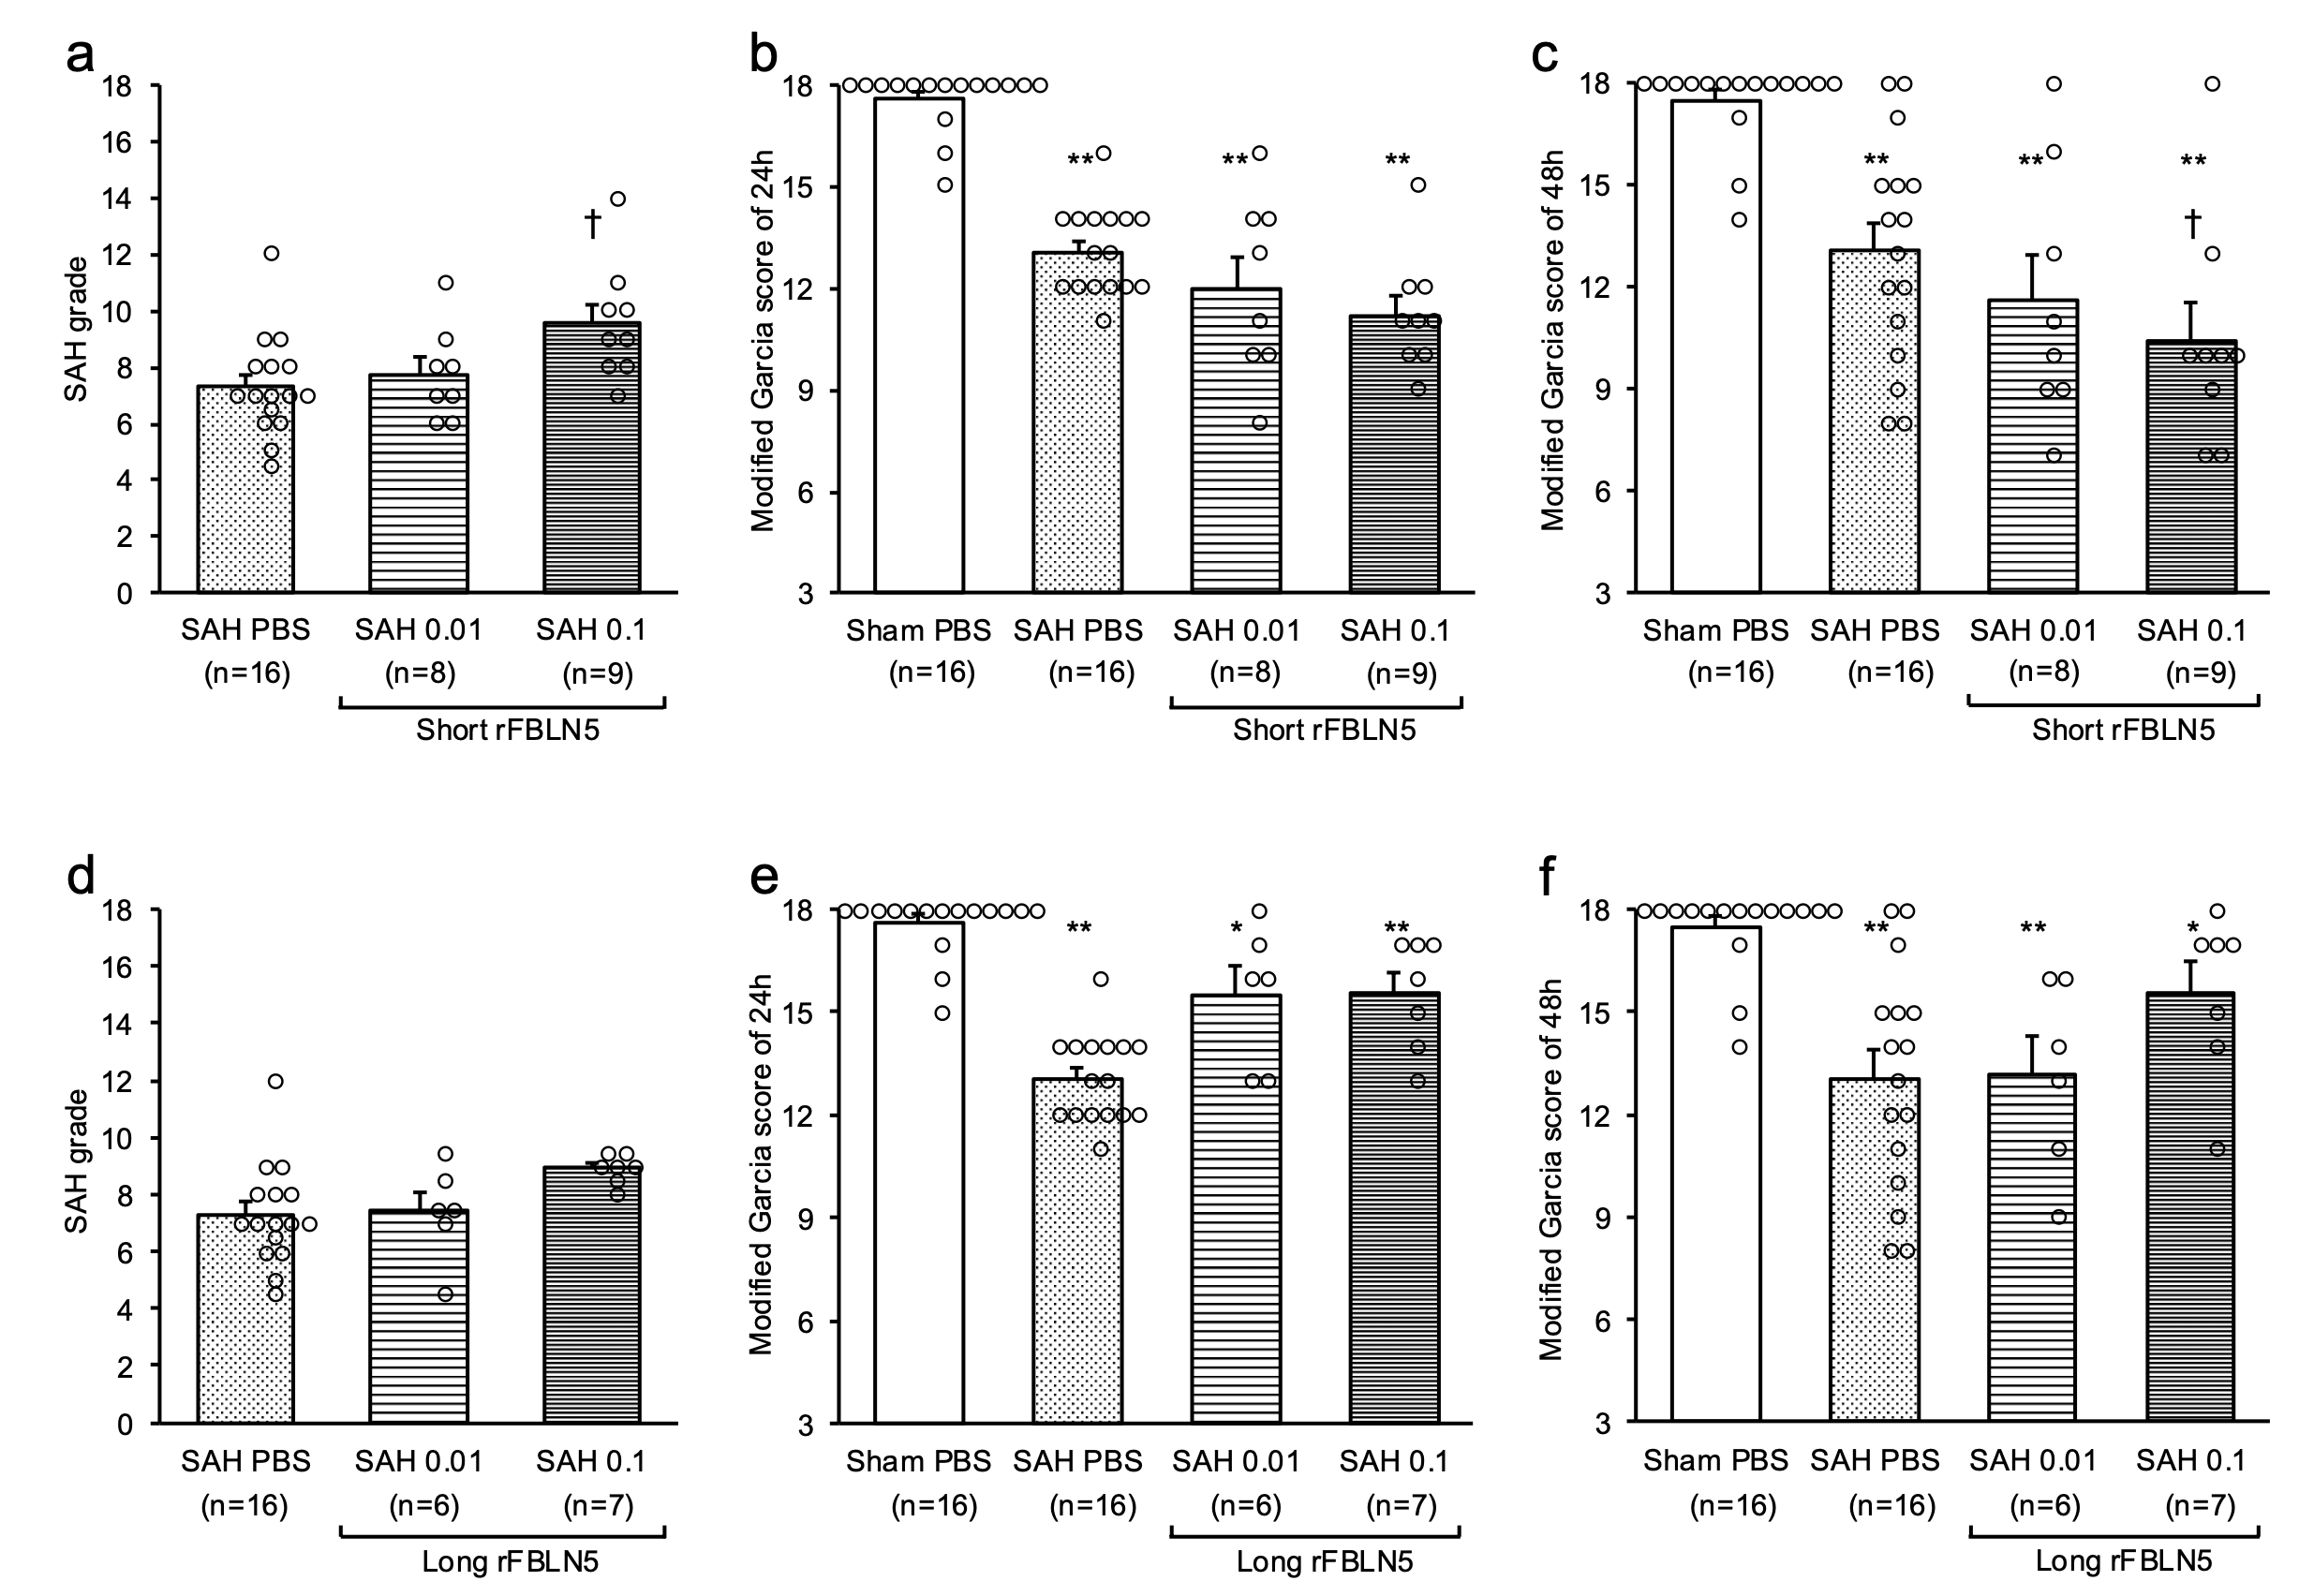


**Supplementary Fig. S3** The effects of 2 dosages (0.01 or 0.1μg) of recombinant fibulin-5 (rFBLN5) administration on subarachnoid hemorrhage (SAH) grade (**a**, **d**) and neurological score at 24 hours (**b**, **e**) and at 48 hours (**c**, **f**) after SAH. To reduce the number of mice sacrificed, sham phosphate-buffered saline (PBS) mice and SAH PBS mice are duplicated in both analyses. *p<0.05 vs Sham PBS group, **p<0.01 vs Sham PBS group, and †p<0.05 vs SAH PBS group; one-way ANOVA (**a**, **d**) or Kruskal-Wallis test (**b**, **c**, **e**, **f**)

**
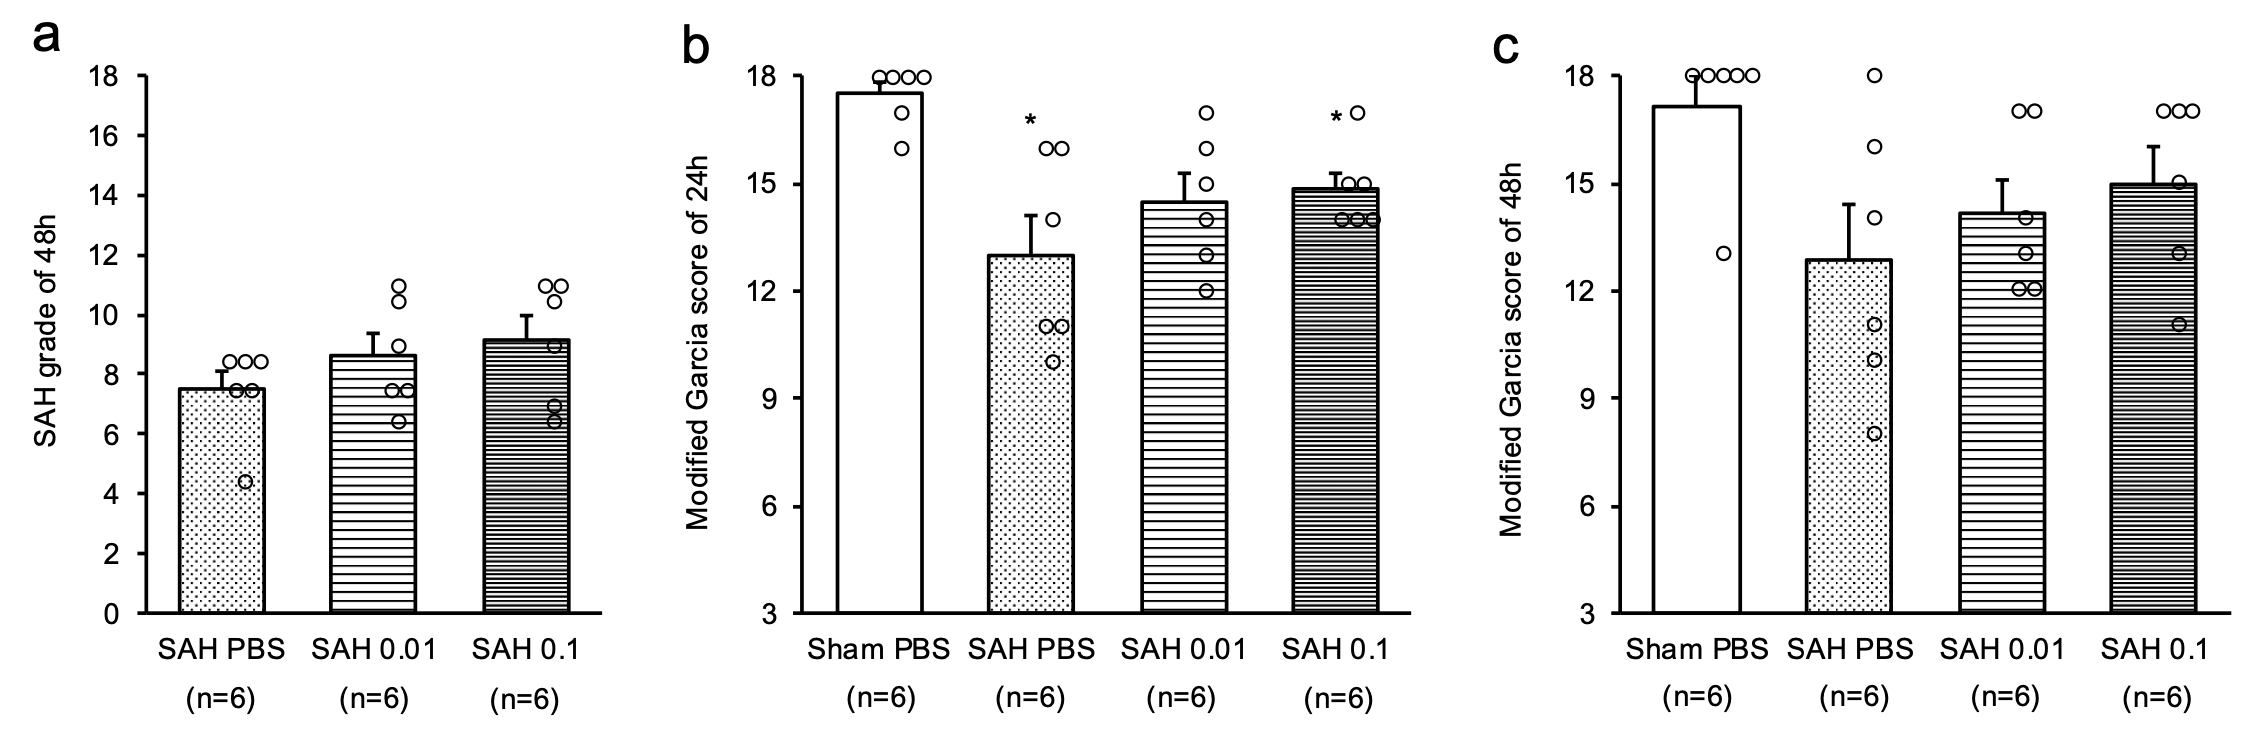
**

**Supplementary Fig. S4** The effects of 2 dosages (0.01 or 0.1μg) of long recombinant fibulin-5 administration on subarachnoid hemorrhage (SAH) grade (**a**) and neurological score at 24 hours (**b**) and at 48 hours (**c**) after SAH. *p<0.05 vs Sham phosphate-buffered saline (PBS) group; Kruskal-Wallis test
